# Supplementary material for: A guide to machine learning for bacterial host attribution using genome sequence data
Source: PubMed Central journal article supplement (PMC6939162; doi:10.1099/mgen.0.000317), 2019-11-28
Supplement: mgen-5-317-s001.pdf [file mgen-5-317-s001.pdf]

## Supplementary file

# A guide to machine learning for bacterial host attribution using genome sequence data

N. Lupolova, S. Lycett, David L. Gally

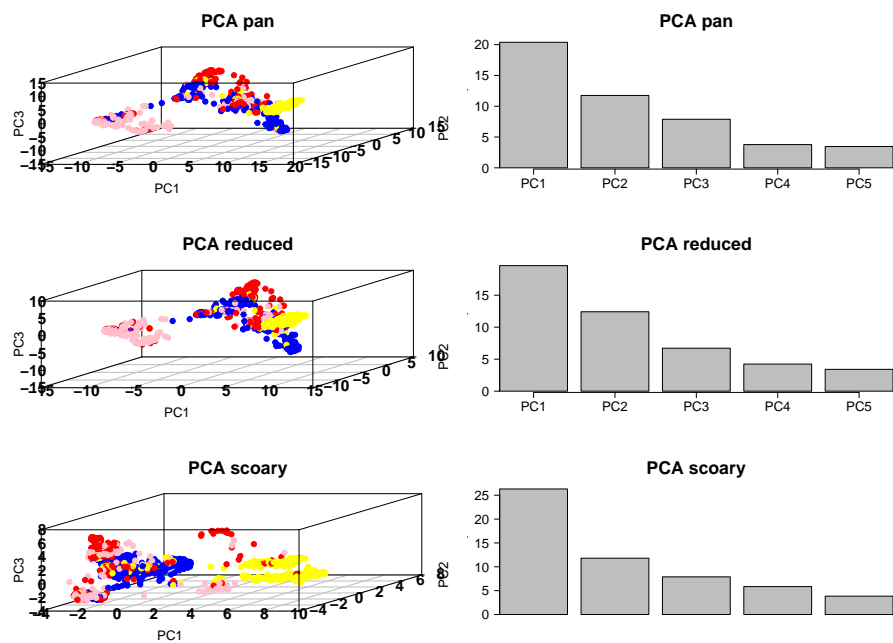

Figure S1: **Principal component analysis.** Principal component analysis (PCA) applied to pan genome protein clusters (PVs) of 1203 bacterial isolates. Colours represent isolate's host: avian (yellow), bovine (red), human (blue), swine (pink). PCA has been applied on the whole dataset of 23,307 PV clusters (top panel), dataset that contain only differential PVs ( 4,041 PVs) (middle panel) and data set with statistically significant PVs (495) as calculated by Scoary (bottom panel).

Tree scale: 0.0001 —

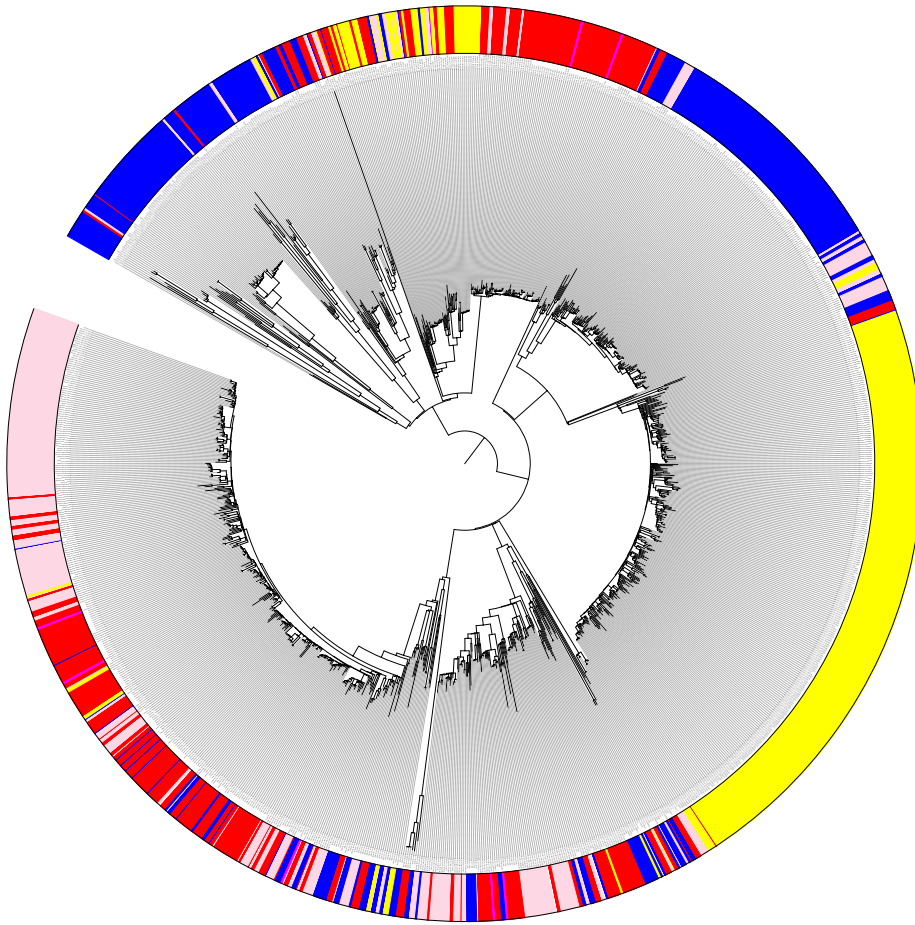

Figure S2: **Core genome phylogeny.** Core SNPs tree for *S. Typhimurium* isolates analysed in the study. The colours represent the host of isolation: avian (yellow), bovine (red), human (blue), swine (pink). Clear sub-clusters relating to host are present but there are also sub-clusters that contain isolates of variable origin.

## Supplementary data script

```
# This script is a supplementary material and provides final list of
libraries, functions and parameters used for supervised and
unsupervised learning in the original research paper "A guide to
machine learning for bacterial host attribution using genome
sequence data".
```

```
library("factoextra")
library("cluster")
library("gdata")
library("e1071")
library("data.table")
library("LCA")
library("vegan")
library("dendextend")
library("h2o")
library("randomForest")
```

```
# load data
```

```
stm_scoary-----
```

```
stm_scoary<- read.csv("stm_scoary.csv", header = TRUE, sep=",")
stm_scoary <- data.frame(stm_scoary[,-1],
row.names=make.names(stm_scoary[,1], unique =TRUE))
```

```
# add extra column with colours for easy plotting afterwards and as
your labels for sML
```

```
A<-c(which(startsWith(rownames(stm_scoary), "typhimurium_a")))
B<-c(which(startsWith(rownames(stm_scoary), "typhimurium_b")))
H<-c(which(startsWith(rownames(stm_scoary), "typhimurium_h")))
S<-c(which(startsWith(rownames(stm_scoary), "typhimurium_s")))
```

```
stm_scoary["host"]<-NA
stm_scoary$host[A]<-"yellow"
stm_scoary$host[B]<-"red"
stm_scoary$host[H]<-"blue"
stm_scoary$host[S]<-"pink"
stm_scoary$host<-as.factor(stm_scoary$host)
```

```
# kmeans -----
```

```
set.seed(21)
```

```
kmeans_scoary<- kmeans(stm_scoary[, -length(stm_scoary)], centers=4,
iter.max = 100, nstart = 20, algorithm = "Hartigan-Wong", trace=T)
```

```
## assess kmeans by silhouette
```

```
-----
```

```
dissE <-daisy(stm_scoary[, -length(stm_scoary)])
dE2   <- dissE^2
sk1   <- silhouette(kmeans_scoary$cluster, dE2, Ordered =TRUE)
#
```

```
#agglomerative clustering-----
```

```
dendA <- as.dendrogram(agnes(dissE, method="ward"))
```

```
#divisive clustering-----
```

```
dendD <- as.dendrogram(diana(dissE, stand=F))
```

```
# topics_lda
```

```
-----
```

```
library(topicmodels)
```

```
#Set parameters for Gibbs sampling
```

```
burnin <- 4000
```

```
iter <- 2000
```

```
thin <- 500
```

```
seed <-list(1,450,800,1001)
```

```
nstart <- 4
```

```
best <- TRUE
```

```
k<-4
```

```
ldaOut <-LDA(stm_scoary[, -length(stm_scoary)] ,k, method="Gibbs",
control=list(nstart=nstart, seed = seed, best=best, burnin = burnin,
iter = iter, thin=thin))
```

```
# svm -----
```

```
#Here is "one against others" approach, therefore change "test" and
"others" for each host accordingly. It is slow, in part because of
the tuning. Better submit jobs in parallel and for each host
independently. Also, to speed up the process, tune and search
parameters can be done only once in the beginning. However, not
tuning the model would decay performance.
```

```
test=c(A)
```

```
others=c( B, H, S)
```

```
probs<-c()
```

```
stm_scoary["host"] <- NA
```

```

stm_scoary$host[test]="A"
stm_scoary$host[others]="0"
stm_scoary$host <- as.factor(stm_scoary$host)

for (i in range(1:nrow(stm_scoary))){

  testidx <- i

  svm_train = stm_scoary[-testidx , ]
  svm_test = stm_scoary[testidx , -length(stm_scoary) ]

#assign weight to classes as now they are unbalanced

  wts<-100 / table(svm_train$host)

  #tune <- tune.svm(host~., data=svm_train, gamma=10^(-6:-1),
cost=10^(1:4), class.weights = wts)
  #summary(tune)
  # Majority of the parameter search attempts resulted in the best
gamma= 1e-04 and best cost=10
  set.seed(21)

  model = svm(host~., data=svm_train, cross=10, method="C-
classification", kernel="radial", probability=T,gamma= 0.001,
cost=10, class.weights = wts)

  svm_prediction = predict(model, svm_test[, -length(svm_test) ],
probability=T)

#check performance, use similarly for all other supervised ML
  #conf_matrix<- table(svm_test$host,svm_prediction )
  #print(conf_matrix)
  #print (probs)
  #print(model$tot.accuracy)

#gather predictions
  probs<-c(probs, round(attr(svm_prediction,"probabilities" ), 3))
}

#randome forest-----
  #reassign all 4 host, because in RF and NN more than 2 classes
can be used at once
  stm_scoary["host"]<-NA
  stm_scoary$host[A]<- "yellow"
  stm_scoary$host[B]<- "red"
  stm_scoary$host[H]<- "blue"
  stm_scoary$host[S]<- "pink"
  stm_scoary$host<-as.factor(stm_scoary$host)

```

```

probs<-c()
for (i in range(1:nrow(stm_scoary))){

  testidx <- i

  rf_train = stm_scoary[-testidx , ]
  rf_test = stm_scoary[testidx , -length(stm_scoary) ]

#do some testing and tuning

#test_var<-rfcv(trainx=rf_train[, -length(colnames(rf_train)) ],
trainy=rf_train$host) )
#tune<- tuneRF(x=rf_train, y=rf_train$host, stepFactor=3, improve=
TRUE, trace=TRUE, plot=TRUE, doBest=TRUE)

model <- randomForest( x=rf_train[, -length(colnames(rf_train)) ],
xtest=rf_train[, -length(colnames(rf_train)) ], y=rf_train$host,
ytest=rf_train$host , importance=TRUE, ntree=5000,
keep.forest=TRUE, mtry= 50)

probs <-c(probs, predict(model, rf_test, type="prob"))
}

#neural network-----

h2o.init(nthreads = -1) #use all available cores
stm_for_h2o<-as.h2o(stm_scoary)

probs<-c()
for (i in range(1:nrow(stm_for_h2o))){

  testidx <- i

  h2o_train = stm_for_h2o[-testidx , ]
  h2o_test = stm_for_h2o[testidx , -length(stm_for_h2o) ]

  # use of the simplest model which for this dataset gives the
best results
  stm_for_h2o.dl <- h2o.deeplearning(x = 1:(ncol(h2o_train)-1), y
= ncol(h2o_train), training_frame = h2o_train, shuffle_training_data
= T, seed =21)

  probs <-c(probs, h2o.predict(stm_for_h2o.dl, h2o_test))
}

h2o.shutdown() # disconnect

```
